# Supplementary material for: Amino and triazole-containing metal–organic frameworks for highly efficient CO2 fixation
Source: Royal Society of Chemistry journal article supplement (doi:10.1039/d1cc04371d), 2021-01-01
Supplement: d1cc04371d1.pdf [file d1cc04371d1.pdf]

Supporting Information for

## **Amino & Triazole-Containing Metal-organic Framework for Highly Efficient CO<sub>2</sub> Fixation**

Yang Li,<sup>a</sup> Xueqin Tian,<sup>a</sup> Weiwei Jiang,<sup>a</sup> Pengyan Wu,<sup>\*a</sup> Han-Shu Li,<sup>a</sup> Man Wang,<sup>a</sup> Chen Lin<sup>a</sup> and Jian Wang<sup>\*a</sup>

<sup>a</sup>School of Chemistry and Materials Science & Jiangsu Key Laboratory of Green Synthetic Chemistry for Functional Materials, Jiangsu Normal University, Xuzhou, 221116, P. R. China.

E-mail: [wpyan@jsnu.edu.cn](mailto:wpyan@jsnu.edu.cn) (P.Y. Wu); [wjian@jsnu.edu.cn](mailto:wjian@jsnu.edu.cn) (J. Wang)

## Materials and Methods

**Reagents and chemicals:** All reagents and solvents were of AR grade and used without further purification unless otherwise noted. 4,4',4''-nitriлотribenzoic acid was synthesized according to the literature methods.<sup>S1</sup> 3,5-di(pyridin-4-yl)-4H-1,2,4-triazol-4-amine (dpta) was purchased from Jinan Henghua Technology Co., Ltd. Zn(NO<sub>3</sub>)<sub>2</sub>·6H<sub>2</sub>O was purchased from Shanghai Fourth Chemical Reagent Company (China). All of the epoxides (allyl glycidyl ether, butyl glycidyl ether, glycol diglycidyl ether, 2-(phenoxyethyl)oxirane, 2-((4-nitrophenoxy)methyl)oxirane, 2-((4-methoxyphenoxy)methyl)oxirane, 1,3-bis(oxiran-2-ylmethoxy)benzene, bis(4-(oxiran-2-ylmethoxy)phenyl)methane) and Tetrabutylammonium Bromide (TBABr) were purchased from Beijing Innochem Science & Technology Co., Ltd.

**Instruments and spectroscopic measurements:** The elemental analyses of C, H and N were performed on a Vario EL III elemental analyzer. <sup>1</sup>H NMR spectra were measured on a Bruker-400 spectrometer with Me<sub>4</sub>Si as an internal standard. X-Ray powder diffraction (XRD) patterns of the Zn-TDA was recorded on a Rigaku D/max-2400 X-ray powder diffractometer (Japan) using Cu-K $\alpha$  ( $\lambda = 1.5405 \text{ \AA}$ ) radiation. FT-IR spectra were recorded as KBr pellets on JASCO FT/IR-430. Thermogravimetric analysis (TGA) was carried out at a ramp rate of 5 °C/min in a nitrogen flow with a Rigaku Thermo plus TG-8120 instrument. The morphologies of the prepared samples were recorded by a Field Emission Scanning Electron Microscopy (SEM) of Hitachi SU8010. Samples were treated *via* Pt sputtering for 90 s before observation. The contents of metal ions were measured by inductively coupled plasma mass spectrometry (ICP-MS; Leeman PROFILE SPEC). The interaction between Zn-TDA and 2-(phenoxyethyl)oxirane molecule was calculated using density functional theory (DFT) method with periodic boundary conditions as implemented in the Vienna Ab initio Simulation Package (VASP 5.4.1). Gas adsorption isotherms were obtained on a BELSORP-max adsorption instrument (BEL Japan Inc.) using a volumetric technique. The initial outgassing of the sample was carried out under high vacuum (P

$< 10^{-2}$  Pa,  $T = 120$  °C) for 24 h to remove solvated water molecules. The CO<sub>2</sub> adsorption isotherms for desolvated compounds were collected in a relative pressure range from 10 to  $1.0 \times 10^5$  Pa.

**BET area calculation:** Once a CO<sub>2</sub> monolayer loading is estimated by applying the BET theory to the simulated CO<sub>2</sub> isotherms at 195 K in the relative pressure range of  $p/p_0 = 0.05$ – $0.25$ , it is converted to a BET area. For this conversion we use:

$$BET\ area = N_m \times (V_m)_{STP} \times N_A \times S_{CO_2}$$

where  $N_m$  is the monolayer loading in “m<sup>3</sup>(STP)/g<sub>adsorbent</sub>” units,  $(V_m)_{STP}$  is the molar density of nitrogen at standard temperature and pressure (33.7 mol/m<sup>3</sup>),  $N_A$  is the Avogadro number ( $6.02 \times 10^{23}$ ) and  $S_{CO_2}$  is the effective cross-sectional area of CO<sub>2</sub> ( $1.7 \times 10^{-19}$  m<sup>2</sup>).

## Experimental

**Synthesis of Zn–TDA:** 4,4',4"-nitrilotribenzoic acid (H<sub>3</sub>tca) (3.8 mg, 10 mM), 3,5-di(pyridin-4-yl)-4H-1,2,4-triazol-4-amine (dpta) (4.0 mg, 17 mM), and Zn(NO<sub>3</sub>)<sub>2</sub>·6H<sub>2</sub>O (10 mg, 34 mM) were dissolved in N,N-Dimethylacetamide/water (2/1, 1 mL) in a screw-capped vial. The resulting mixture was placed in an oven at 90°C for 3 days; upon cooling, light yellow block crystals were collected by filtration. Yield: 73%. Anal. calc. for [Zn<sub>3</sub>(tca)<sub>2</sub>(dpta)]·(DMA)<sub>3</sub>(H<sub>2</sub>O): C 54.28, H 4.21, N 10.55%; Found: C 54.19, H 4.19, N 10.52%.

**Typical Procedure for the Reaction of CO<sub>2</sub> Cycloaddition of Epoxides:** The catalytic reaction was conducted in a 30-mL autoclave reactor, which was purged with 1-MPa CO<sub>2</sub> under constant pressure for 15 min to allow the system equilibration. The vessel was set in an oil bath with frequent stirring at 373 K for 1.5 h. At the end of the reaction, the reactor was opened after placing it in an ice bath for 20 min. The catalysts were separated through centrifugation, and a small aliquot of the supernatant reaction mixture was analyzed by <sup>1</sup>H NMR to calculate the reaction yields.

## Crystallography:

Intensities were collected on a Bruker SMART APEX CCD diffractometer with graphite monochromated Mo-K $\alpha$  ( $\lambda = 0.71073 \text{ \AA}$ ) using the SMART and SAINT programs. The structure was solved by direct methods and refined on F2 by full-matrix least-squares methods with SHELXTL version 5.1. Non-hydrogen atoms of the ligand backbones were refined anisotropically. Hydrogen atoms within the ligand backbones were fixed geometrically at calculated positions and allowed to ride on the parent non-hydrogen atoms, and the data were treated with the SQUEEZE routine within PLATON.

Crystal data of Zn-TDA: C<sub>62</sub>H<sub>52</sub>N<sub>10</sub>O<sub>15</sub>Zn<sub>3</sub>,  $M_r = 1373.24$ , Triclinic, space group  $P-1$ ,  $a = 13.7019(13)$ ,  $b = 13.9995(12)$ ,  $c = 21.143(2) \text{ \AA}$ ,  $\alpha = 74.258(5)$ ,  $\beta = 79.162(5)$ ,  $\gamma = 63.495(4)$ ,  $V = 3482.6(6) \text{ \AA}^3$ ,  $Z = 2$ ,  $D_c = 1.310 \text{ g cm}^{-3}$ ,  $\mu(\text{Mo-K}\alpha) = 1.092 \text{ mm}^{-1}$ ,  $T = 296(2) \text{ K}$ . 8884 unique reflections [ $R_{\text{int}} = 0.0511$ ]. Final  $R_I[\text{with } I > 2\sigma(I)] = 0.0443$ ,  $wR_2(\text{all data}) = 0.1276$ , GOOF = 1.026. CCDC number: 2094908.

**Table S1** Selective bond distance (Å) and angle (°) in Zn–TDA.

|                    |            |                     |            |
|--------------------|------------|---------------------|------------|
| Zn(1)–O(5A)        | 1.968(3)   | Zn(1)–O(2)          | 1.994(2)   |
| Zn(1)–O(1B)        | 1.998(2)   | Zn(1)–N(3)          | 2.059(3)   |
| Zn(1)–O(3A)        | 2.418(3)   | Zn(2)–O(12C)        | 1.918(2)   |
| Zn(2)–O(4B)        | 1.930(2)   | Zn(2)–O(6)          | 1.956(2)   |
| Zn(2)–O(7D)        | 1.955(2)   | Zn(3)–O(9)          | 1.963(2)   |
| Zn(3)–O(10E)       | 1.974(3)   | Zn(3)–O(8F)         | 1.978(2)   |
| Zn(3)–N(4)         | 2.029(3)   | Zn(3)–O(11E)        | 2.297(3)   |
| O(5A)–Zn(1)–O(2)   | 143.55(12) | O(5A)–Zn(1)–O(1B)   | 97.44(12)  |
| O(2)–Zn(1)–O(1B)   | 107.44(11) | O(5A)–Zn(1)–N(3)    | 100.92(12) |
| O(2)–Zn(1)–N(3)    | 102.43(11) | O(1B)–Zn(1)–N(3)    | 96.04(11)  |
| O(5A)–Zn(1)–O(3A)  | 58.72(11)  | O(2)–Zn(1)–O(3A)    | 92.65(11)  |
| O(1B)–Zn(1)–O(3A)  | 155.91(12) | N(3)–Zn(1)–O(3A)    | 92.35(12)  |
| O(12C)–Zn(2)–O(4B) | 117.10(12) | O(12C)–Zn(2)–O(6)   | 98.40(11)  |
| O(4B)–Zn(2)–O(6)   | 114.71(10) | O(12C)–Zn(2)–O(7D)  | 120.45(11) |
| O(4B)–Zn(2)–O(7D)  | 103.11(10) | O(7D)–Zn(2)–O(6)    | 102.57(10) |
| O(9)–Zn(3)–O(10E)  | 99.20(11)  | O(9)–Zn(3)–O(8F)    | 101.57(10) |
| O(10E)–Zn(3)–O(8F) | 143.76(12) | O(9)–Zn(3)–N(4)     | 103.67(11) |
| O(10E)–Zn(3)–N(4)  | 106.88(12) | O(8F)–Zn(3)–N(4)    | 96.64(10)  |
| O(9)–Zn(3)–O(11E)  | 152.86(13) | O(10E)–Zn(3)–O(11E) | 58.90(11)  |
| O(8F)–Zn(3)–O(11E) | 91.13(10)  | N(4)–Zn(3)–O(11E)   | 98.48(13)  |

Symmetry code A:  $x, 1+y, z$ ; B:  $1+x, y, z$ ; C:  $x, y, -1+z$ ; D:  $x, -1+y, -1+z$ ; E:  $1+x, -1+y, z$ ; F:  $x, -1+y, z$ .

**Figure S1.** Three-dimensionally connected channels in Zn-TDA with the Connolly surfaces (Connolly radius: 1.6 Å) along *a*-axis. Water and DMA molecules are omitted for clarity. The orange arrows indicate the free Lewis acid zinc centers.

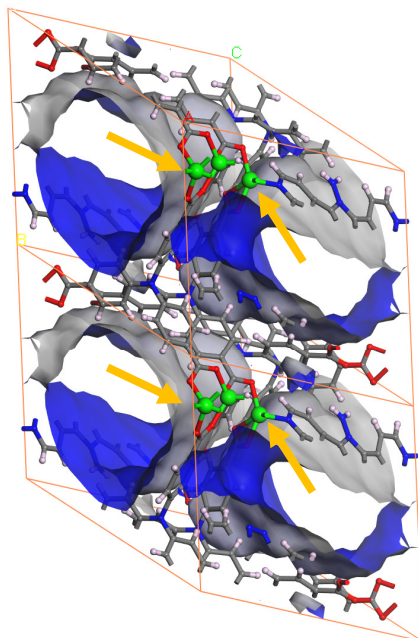

**Figure S2.** Py-FTIR spectra of Zn-TDA.

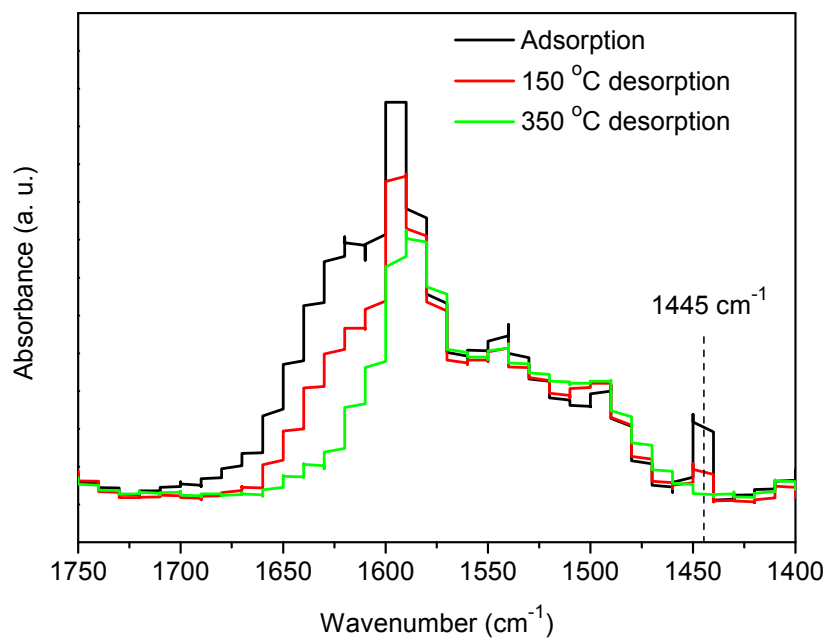

**Figure S3.** One-dimensional rectangle channels along the  $a$ -axis in an identical net of Zn-TDA.

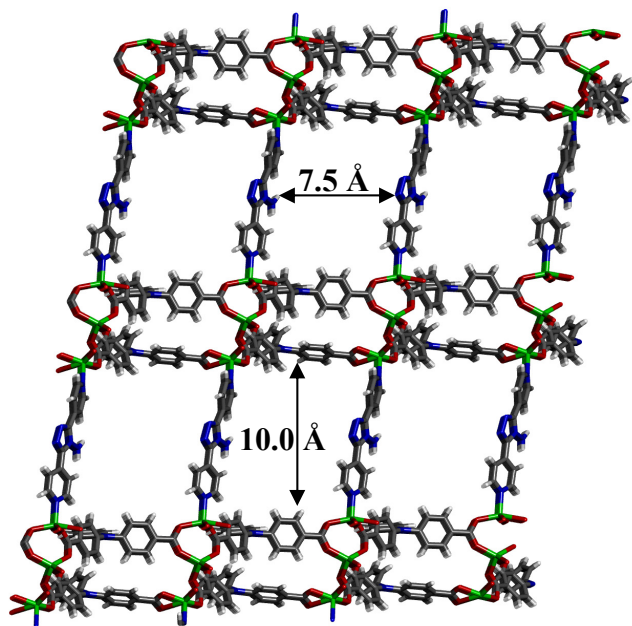



**Figure S4.** TGA trace of Zn-TDA.

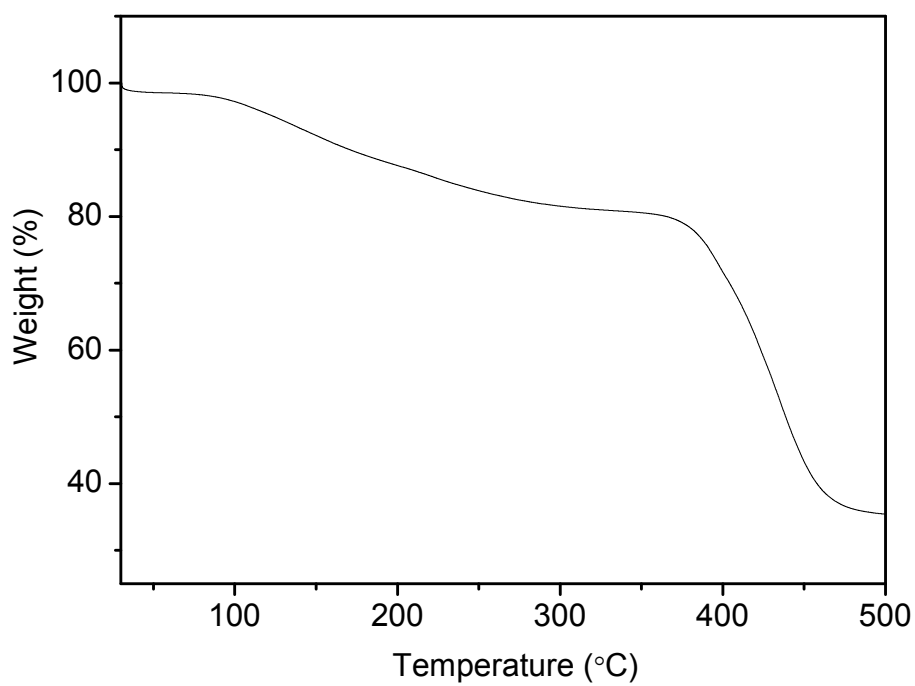

**Figure S5.** The CO<sub>2</sub> isotherms at 273 K and 293 K (symbols) and the virial equation fits (lines) for Zn-TDA.

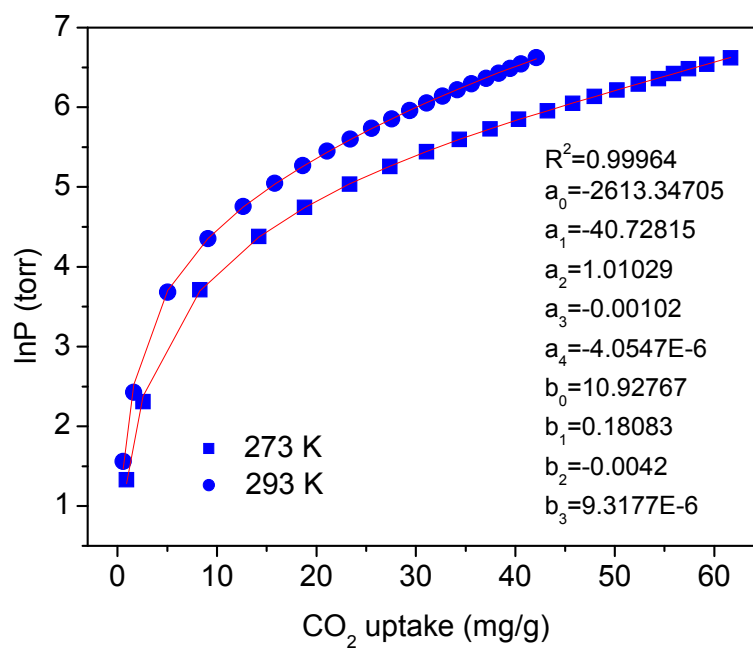

**Figure S6.** Interaction representation between 2-(phenoxy)methyl)oxirane and Zn-TDA computed by density functional theory calculation.

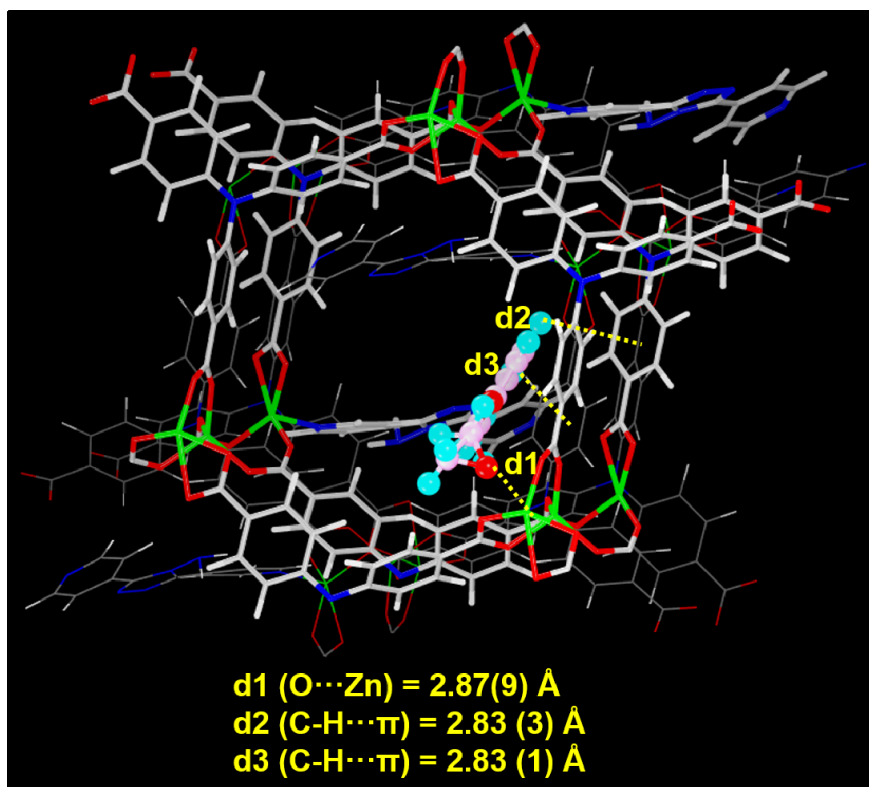

**Figure S7.** The proposed mechanism for the cycloaddition reaction catalyzed by Zn–TDA (cyan sphere: open metal site).

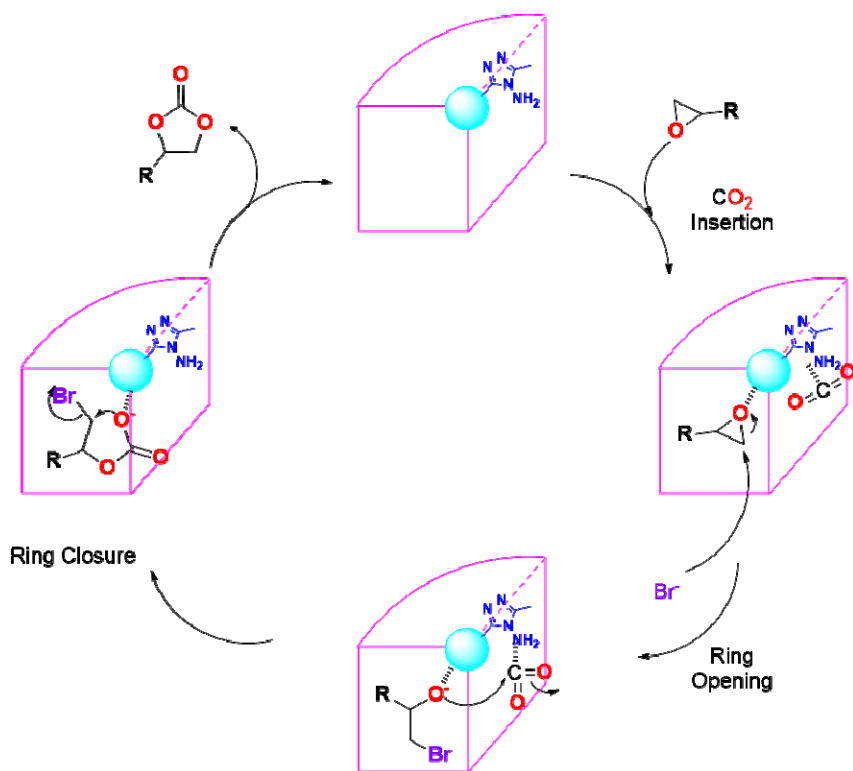

**Figure S8.** SEM image of Zn-TDA (left) and Zn-TDA (right) after 20 cycles of catalysis.

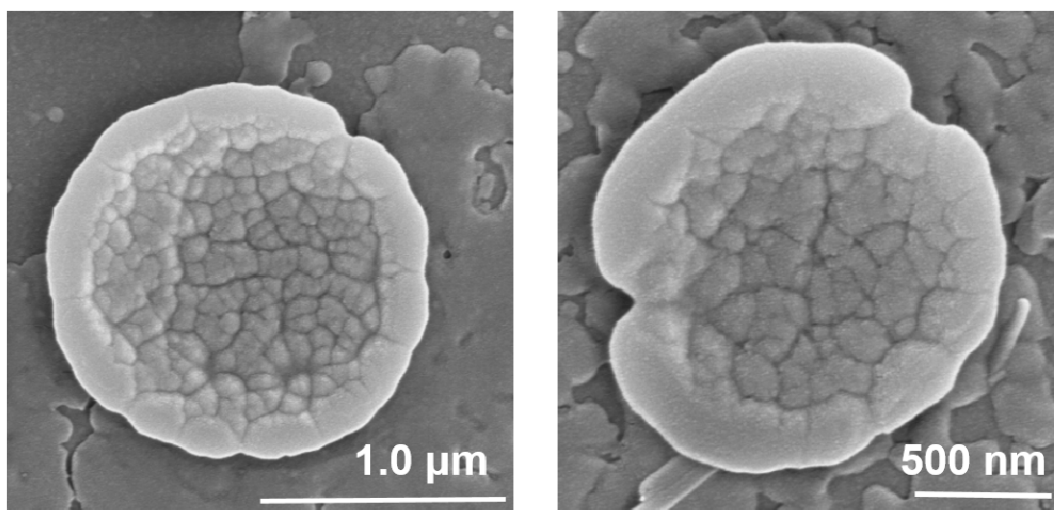

**Figure S9.** CO<sub>2</sub> sorption isotherms of Zn-TDA before and after catalysis at 195K.

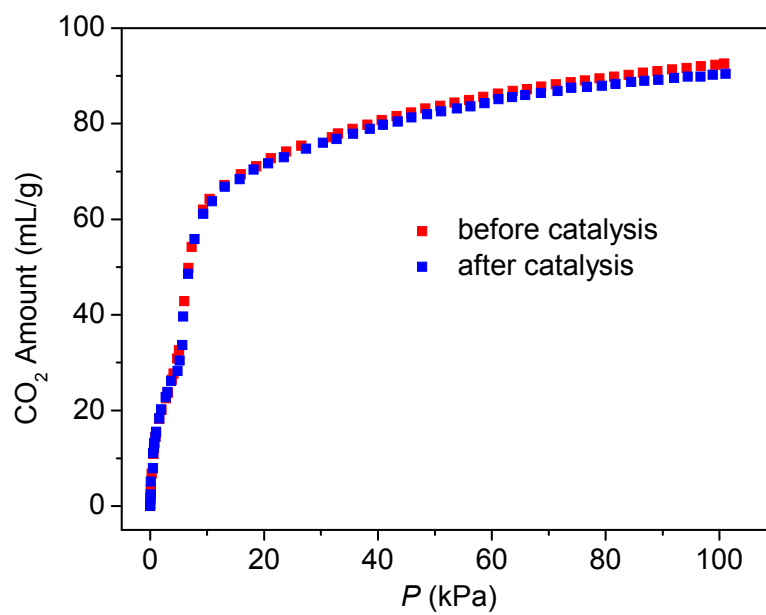

**Table S2.** Comparison of the isosteric heat ( $Q_{st}$ ) with the selected MOFs.

| Entry | MOFs        | $Q_{st}$ (kJ mol <sup>-1</sup> ) | Ref. | Entry | MOFs                                        | $Q_{st}$ (kJ mol <sup>-1</sup> ) | Ref.      |
|-------|-------------|----------------------------------|------|-------|---------------------------------------------|----------------------------------|-----------|
| 1     | SIFSIX-3-Zn | 45                               | S2   | 12    | NH <sub>2</sub> -Zr(H <sub>2</sub> L)       | 27.2                             | S13       |
| 2     | 1'          | 37                               | S3   |       | F-NH <sub>2</sub> -Zr(H <sub>2</sub> L)     | 30.4                             |           |
| 3     | FJI-H14     | 26.6-30.5                        | S4   | 13    | NUC-9                                       | 25.8                             | S14       |
| 4     | 1           | 36.7                             | S5   | 14    | Co <sub>7</sub> -MOFs                       | 25-36                            | S15       |
| 5     | FJI-C10     | 20.94                            | S6   | 15    | 1                                           | 29                               | S16       |
| 6     | Yb-DDPY     | 28.37                            | S7   | 16    | 1                                           | 23                               | S17       |
|       | Yb-DDIA     | 30.87                            |      |       | 2                                           | 21                               |           |
| 7     | 1'          | 23.3                             | S8   | 17    | MOF1'                                       | 37.1                             | S18       |
|       | 2'          | 28.1                             |      | 18    | 5a                                          | 83.3                             | S19       |
| 8     | JLU-MOF58   | 19                               | S9   | 19    | [Co <sub>2</sub> (tzpa)(OH)]                | 38.5                             | S20       |
| 9     | 1a          | 23                               | S10  | 20    | [Zn <sub>3</sub> (pbdc) <sub>2</sub> ]·Hpip | 32                               | S21       |
| 10    | Ni-MOF-1a   | 33                               | S11  | 21    | SNU-77H                                     | 19.4                             | S22       |
| 11    | MOF-74-Ni   | 41.0                             | S12  | 22    | Zn-TDA                                      | 21.7-25.2                        | This work |

**Table S3.** The molecular size of selected substrates.

| Entry | Epoxides                                                                          | Molecular Size                                                                    | Entry | Epoxides                                                                           | Molecular Size                                                                      |
|-------|-----------------------------------------------------------------------------------|-----------------------------------------------------------------------------------|-------|------------------------------------------------------------------------------------|-------------------------------------------------------------------------------------|
| 1     | 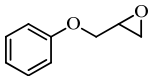 |  | 5     |  |  |
| 2     |  |  | 6     |  |  |
| 3     |  |  | 7     |  |  |
| 4     |  |  | 8     |  |  |



**Table S4.** Comparison with different MOFs catalysts in the cyclic addition of CO<sub>2</sub> and 2-(phenoxy)methyl)oxirane under similar conditions (100 °C under 1.0 MPa CO<sub>2</sub>).

| Entry | Catalyst                              | CO <sub>2</sub> uptake (cm <sup>3</sup> g <sup>-1</sup> ) | $Q_{st}$ (kJ mol <sup>-1</sup> ) | T (hr) | TON <sup>[a]</sup> | TOF (h <sup>-1</sup> ) <sup>[b]</sup> | Ref.      |
|-------|---------------------------------------|-----------------------------------------------------------|----------------------------------|--------|--------------------|---------------------------------------|-----------|
| 1     | Ni-TCPE1                              | 47.8 at 273 K<br>32.8 at 298 K                            | -                                | 12     | 2000               | 167                                   | S23       |
| 2     | {Ni <sub>4</sub> L(OH) <sub>2</sub> } | -                                                         | -                                | 9      | 4000               | 444                                   | S24       |
| 3     | 1                                     | -                                                         | -                                | 12     | 1429               | 119                                   | S25       |
| 4     | Zr(H <sub>4</sub> L)                  | -                                                         | -                                | 6      | 3000               | 500                                   | S26       |
| 5     | Zn-NTTA                               | -                                                         | -                                | 8      | 3920               | 490                                   | S27       |
|       | Cu-NTTA                               | 115.6 at 273 K<br>65.5 at 298 K                           | -                                | 8      | 3830               | 479                                   |           |
| 6     | 1                                     | -                                                         | -                                | 8      | 25.6               | 3.2                                   | S28       |
| 7     | ZIF-67                                | -                                                         | -                                | 14     | 37.3               | 2.7                                   | S29       |
| 8     | Zn-DPA                                | 44.5 at 273 K<br>34.8 at 298 K                            | 29.4–32.4                        | 2      | 4000               | 2000                                  | S30       |
| 9     | Zn-TDA                                | 31.4 at 273 K<br>21.5 at 298 K                            | 21.7-25.2                        | 1.5    | 10000              | 6667                                  | This work |

[a] TON is the turnover number: Moles of cyclic carbonate per mole of catalyst; [b] TOF is the turnover frequency: Moles of cyclic carbonate per mole of catalyst per hour.

**Table S5.** Comparison with different MOFs catalysts in the cyclic addition of CO<sub>2</sub> and 2-(phenoxyethyl)oxirane under similar conditions (r.t. under 0.1 MPa CO<sub>2</sub>).

| Entry | Catalyst | CO <sub>2</sub> uptake (cm <sup>3</sup> g <sup>-1</sup> ) | Q <sub>st</sub> (kJ mol <sup>-1</sup> ) | T (hr) | TON <sup>[a]</sup> | TOF (h <sup>-1</sup> ) <sup>[b]</sup> | Ref.      |
|-------|----------|-----------------------------------------------------------|-----------------------------------------|--------|--------------------|---------------------------------------|-----------|
| 1     | MMPF-18  | 60 at 273 K<br>33.6 at 298 K                              | 23                                      | 48     | 133                | 2.8                                   | S31       |
| 2     | MMCF-2   | -                                                         | -                                       | 48     | 300.8              | 6.3                                   | S32       |
| 3     | Zn-DPA   | 44.5 at 273 K<br>34.8 at 298 K                            | 29.4-32.4                               | 2      | 320                | 160                                   | S30       |
| 4     | 1'       | 45.58 at 273 K<br>33.62 at 298 K                          | 38.4                                    | 24     | 662                | 27.6                                  | S33       |
| 5     | 1a       | 134.7 at 273 K<br>93.8 at 298 K                           | 32.4                                    | 48     | 104.6              | 2.2                                   | S34       |
| 6     | JUC-1000 | 125 at 273 K<br>80 at 298 K                               | 23                                      | 48     | 116                | 2.4                                   | S35       |
| 7     | PFC-31   | -                                                         | -                                       | 48     | 71                 | 1.5                                   | S36       |
| 8     | 1        | 11.4 at 298 K                                             | -                                       | 24     | 328                | 13.7                                  | S37       |
| 9     | 1'       | 159.41 at 273 K<br>89.98 at 298 K                         | 26.72                                   | 12     | 440                | 36.7                                  | S38       |
| 10    | 1        | 41.75 at 298 K                                            | 32.7                                    | 24     | 100.4              | 4.2                                   | S39       |
| 11    | Zn-TDA   | 31.4 at 273 K<br>21.5 at 298 K                            | 21.7-25.2                               | 1.5    | 1000               | 667                                   | This Work |

[a] TON is the turnover number: Moles of cyclic carbonate per mole of catalyst; [b] TOF is the turnover frequency: Moles of cyclic carbonate per mole of catalyst per hour.

### Supplementary Reference:

- [S1] J. Wang, C. He, P. Wu, J. Wang and C. Duan, *J. Am. Chem. Soc.*, 2011, **132**, 12402–12405.
- [S2] P. Nugent, Y. Belmabkhout, S. D. Burd, A. J. Cairns, R. Luebke, K. Forrester, T. Pham, S. Ma, B. Space, L. Wojtas, M. Eddaoudi and M. J. Zaworotko, *Nature*, 2013, **495**, 80–84.
- [S3] A. Verma, D. De, K. Tomar and P. K. Bharadwaj, *Inorg. Chem.*, 2017, **56**, 9765–9771.
- [S4] L. Liang, C. Liu, F. Jiang, Q. Chen, L. Zhang, H. Xue, H.-L. Jiang, J. Qian, D. Yuan and M. Hong, *Nature Commun.*, 2017, **8**, 1233.
- [S5] P.-Z. Li, X.-J. Wang, J. Liu, H. S. Phang, Y. Li and Y. Zhao, *Chem. Mater.*, 2017, **29**, 9256–9261.
- [S6] J. Liang, Y.-Q. Xie, X.-S. Wang, Q. Wang, T.-T. Liu, Y.-B. Huang and R. Cao, *Chem. Commun.*, 2018, **54**, 342–345.
- [S7] N. Wei, Y. Zhang, L. Liu, Z.-B. Han and D.-Q. Yuan, *Appl. Catal. B-Environ.*, 2017, **219**, 603–610.
- [S8] D. Zhao, X.-H. Liu, J.-H. Guo, H.-J. Xu, Y. Zhao, Y. Lu and W.-Y. Sun, *Inorg. Chem.*, 2018, **57**, 2695–2704.
- [S9] X. Sun, J. Gu, Y. Yuan, C. Yu, J. Li, H. Shan, G. Li and Y. Liu, *Inorg. Chem.*, 2019, **58**, 7480–7487.
- [S10] S. Cheng, Y. Wu, J. Jin, J. Liu, D. Wu, G. Yang and Y.-Y. Wang, *Dalton Trans.*, 2019, **48**, 7612–7618.
- [S11] J. Lia, W.-J. Li, S.-C. Xu, B. Li, Y. Tang and Z.-F. Lin, *Inorg. Chem. Commun.*, 2019, **106**, 70–75.
- [S12] Q. Yang, S. Vaesen, F. Ragon, A. D. Wiersum, D. Wu, A. Lago, T. Devic, C. Matineau, F. Taulelle, P. L. Llewellyn, H. Jobic, C. Zhong, C. Serre, G. D. Weireld and G. Maurin, *Angew. Chem. Int. Ed.*, 2013, **52**, 10316–10320.
- [S13] X. Sun, L. Shi, H. Hu, H. Huang and T. Ma, *Adv. Sustainable Syst.*, 2020, **4**, 2000098.
- [S14] H. Lv, H. Chen, L. Fan and X. Zhang, *Dalton Trans.*, 2020, **49**, 14656–14664.
- [S15] Z.-X. Bian, Y.-Z. Zhang, D. Tian, X. Zhang, L.-H. Xie, M. Zhao, Y. Xie and J.-R. Li, *Cryst. Growth Des.*, 2020, **20**, 7972–7978.
- [S16] M. Jia, J. Li, J. Gu, L. Zhang and Y. Liu, *Mater. Chem. Front.*, 2021, **5**, 1398–1404.

- [S17] B. Zhang, P.-Y. Guo, L.-N. Ma, B. Liu, L. Hou and Y.-Y. Wang, *Inorg. Chem.*, 2020, **59**, 5231–5239.
- [S18] S. S. Dhankhar and C. M. Nagaraja, *New J. Chem.*, 2020, **44**, 9090–9096.
- [S19] J. Liu, M. Hang, D. Wu, J. Jin, J.-G. Cheng, G. Yang and Y.-Y. Wang, *Inorg. Chem.*, 2020, **59**, 2450–2457.
- [S20] H. H. Wang, L. Hou, Y. Z. Li, C. Y. Jiang, Y. Y. Wang and Z. G. Zhu, *ACS Appl. Mater. Interfaces*, 2017, **9**, 17969–17976.
- [S21] Y. Ling, M. L. Deng, Z. X. Chen, B. Xia, X. F. Liu, Y. T. Yang, Y. Zhou and L. Weng, *Chem. Commun.*, 2013, **49**, 78–80.
- [S22] H. J. Park, D. W. Lim, W. S. Yang, T. R. Oh and M. P. Suh, *Chem.-Eur. J.*, 2011, **17**, 7251–7260.
- [S23] Z. Zhou, C. He, J. Xiu, L. Yang and C. Duan, *J. Am. Chem. Soc.*, 2015, **137**, 15066–15069.
- [S24] C.-Y. Gao, Y. Yang, J. Liu and Z.-M. Sun, *Dalton Trans.*, 2019, **48**, 1246–1250.
- [S25] J. Ai, X. Min, C.-Y. Gao, H.-R. Tian, S. Dang and Z.-M. Sun, *Dalton Trans.*, 2017, **46**, 6756–6761.
- [S26] C.-Y. Gao, J. Ai, H.-R. Tian, D. Wu and Z.-M. Sun, *Chem. Commun.*, 2017, **53**, 1293–1296.
- [S27] X. Guo, Z. Zhou, C. Chen, J. Bai, C. He and C. Duan, *ACS Appl. Mater. Interfaces*, 2016, **8**, 31746–31756.
- [S28] C. Chen, *J. Mol. Struct.*, 2020, **1208**, 127923.
- [S29] B. Mousavi, S. Chaemchuen, B. Moosavi, Z. Luo, N. Gholampour and F. Verpoort, *New J. Chem.*, 2016, **40**, 5170–5176.
- [S30] P. Wu, Y. Li, J.-J. Zheng, N. Hosono, K. Otake, J. Wang, Y. Liu, L. Xia, M. Jiang, S. Sakaki and S. Kitagawa, *Nature Commun.*, 2019, **10**, 4362.
- [S31] W.-Y. Gao, C.-Y. Tsai, L. Wojtas, T. Thiounn, C.-C. Lin and S. Ma, *Inorg. Chem.*, 2016, **55**, 7291–7294.
- [S32] W.-Y. Gao, Y. Chen, Y. Niu, K. Williams, L. Cash, P. J. Perez, L. Wojtas, J. Cai, Y.-S. Chen and S. Ma, *Angew Chem. Int. Ed.*, 2014, **53**, 2615–2619.
- [S33] P. Das and S. K. Mandal, *ACS Appl. Mater. Interfaces*, 2020, **12**, 37137–37146.

- [S34] X.-Y. Li, L.-N. Ma, Y. Liu, L. Hou, Y.-Y. Wang and Z. Zhu, *ACS Appl. Mater. Interfaces*, 2018, **10**, 10965–10973.
- [S35] H. He, Q. Sun, W. Gao, J. A. Perman, F. Sun, G. Zhu, B. Aguila, K. Forrest, B. Space and S. Ma, *Angew Chem. Int. Ed.*, 2018, **57**, 4657–4662.
- [S36] H. Xue, T. Li, Q. Yin, G. Huang and T.-F. Liu, *Chinese J. Struct. Chem.*, 2020, **39**, 2027–2032.
- [S37] R. A. Agarwal, A. K. Gupta and D. De, *Cryst. Growth Des.*, 2019, **19**, 2010–2018.
- [S38] V. Sharma, D. De, R. Saha, R. Das, P. K. Chattaraj and P. K. Bharadwaj, *Chem. Commun.*, 2017, **53**, 13371–13374.
- [S39] V. Gupta and S. K. Mandal, *Chem. Eur. J.*, 2020, **26**, 2658–2665.
